# Supplementary material for: Matrix-assisted laser desorption/ionization time of flight mass spectrometry for comprehensive indexing of East African ixodid tick species
Source: PubMed Central journal article supplement (PMC4792108; doi:10.1186/s13071-016-1424-6), 2016-03-15

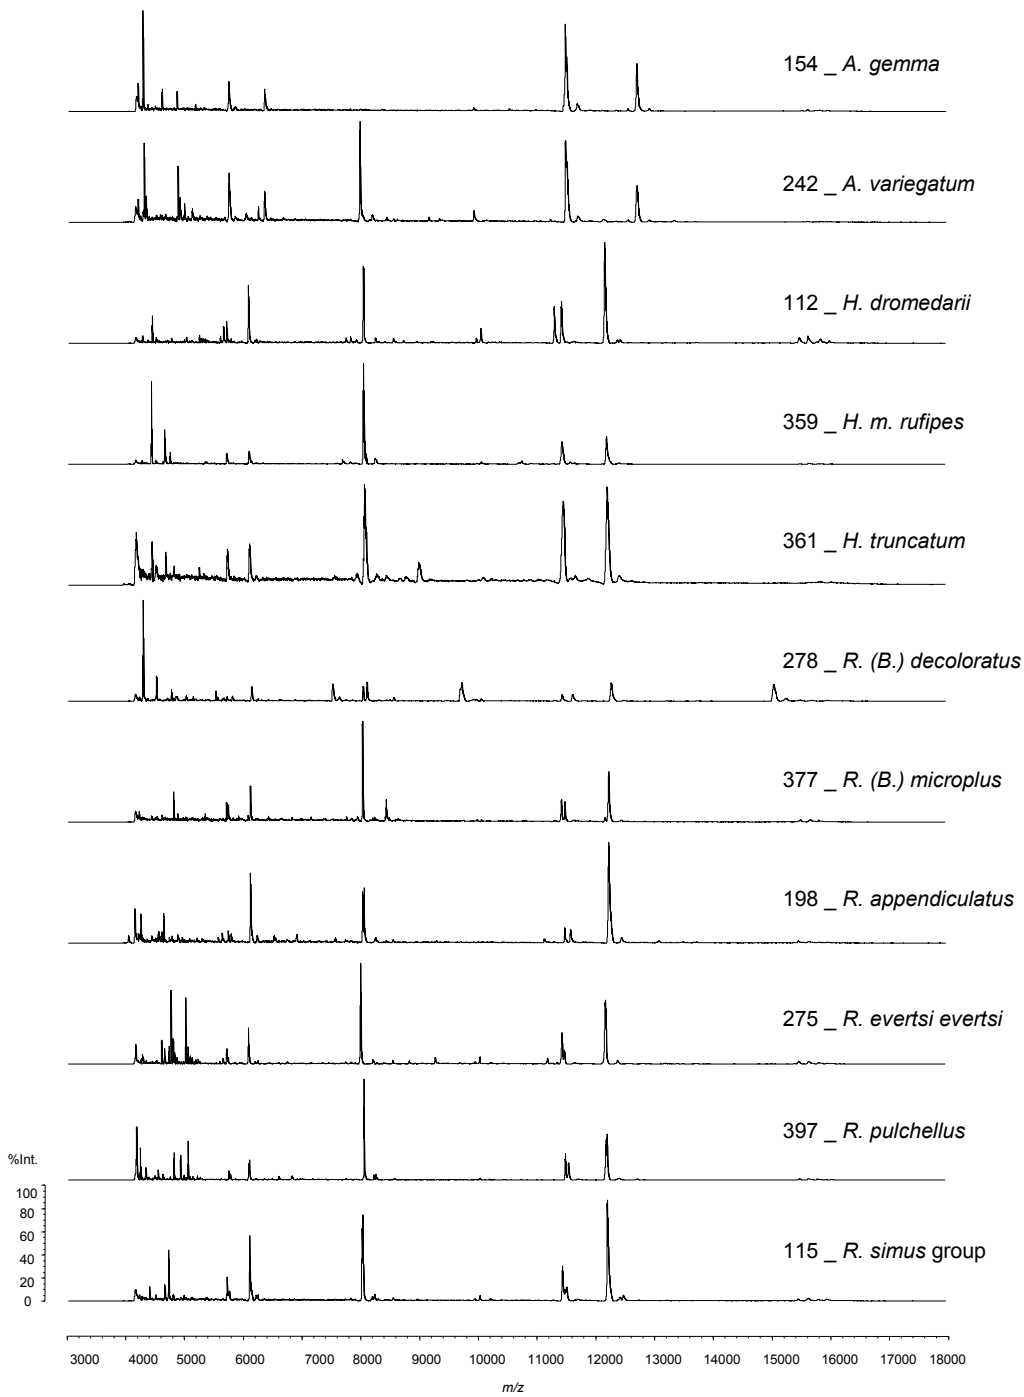

Supplement: 13071_2016_1424_MOESM1_ESM.pdf [file 13071_2016_1424_MOESM1_ESM.pdf]
